# Supplementary material for: An empirical method to correct for temperature dependent variations in the overlap function of CHM15k ceilometers
Source: Copernicus journal article supplement (doi:10.5194/amt-2016-30), 2016-02-18
Supplement: Supplementary file [file amt-2016-30-AC2-supplement.pdf]

# **An empirical method to correct for temperature dependent variations in the overlap function of CHM15k ceilometers**

## **Answers to Referee 2**

**By M. Hervo et al.**

The authors would like to thank the reviewer for his constructive remarks. For each comment, the answers are given below.

The revised manuscript with all the changes highlighted is provided separately.

### **F. Wagner (Referee #2)**

Received and published: 3 May 2016

General comments:

The manuscript by Hervo et al. investigates measurement artefacts originating from an imperfectly known overlap function of a ceilometer. The authors developed an automated method for the determination of improved overlap functions based on the assumption of temporal and vertical homogeneity of the backscatter and extinction coefficient. Finally they showed that this improved overlap functions are correlated with temperature changes.

The paper is clearly written clearly I recommend it for acceptance with minor corrections.

Detailed comments:

- Several times (e.g. page 2 line 31; page 3 line 6) the authors used the term “homogeneous atmosphere”. This term is misleading. The authors should be more precise. Only on page 5 the authors state “The aerosol extinction and backscatter coefficients are constant in a range interval during the time period of observation (assumption of homogeneous atmosphere)”.

Homogeneous atmosphere is now defined as: “constant aerosol backscatter and aerosol extinction coefficients”.

- page3 line 26: “built by the company Lufft Mess- und Regeltechnik GmbH (previously Jenoptik)” For avoiding misunderstandings, the ceilometer is now build by Lufft and was in former times built by Jenoptik. Lufft and Jenoptik are two different companies.

“previously Jenoptik” was replaced by “previously manufactured by Jenoptik”

- page 5, equation 3: The authors should re-check the equations. I am missing the normalization with respect to the number of laser shots.

P is now explicitly defined as received power per pulse.

- page 7 line 16: “The overlap function provided by the manufacturer agrees well down to 600 m.” If I understood the algorithm correctly, that statement is not a result of the algorithm, but a necessary condition for the quality tests (see appendix) and hence not at all surprising. This should be clearly written in the manuscript.

The following sentence was added in the manuscript:

“..., which is simply the result from the fact that the function provided by the manufacturer is considered correct down to this altitude.”

- section 4.2: although the data show a correlation with the internal temperature of the instrument, the explanation and discussion is not convincing. In case that such a correlation exists then the daily cycle of the internal temperature should be visible in the data as well. However this daily variability was removed in the algorithm, because the final overlap for a day is the median overlap function of all selected individual overlap functions for this particular day. Hence this section should be re-written and discussed why daily temperature variations are discarded by the algorithm but still an annual cycle of the overlap function remains which is correlated to the internal temperature. Maybe a different explanation/correlation can be thought of? Please note that any changes in this section will affect other sections of the manuscript, too.

Indeed if, for a specific day, significantly different overlap correction functions were retrieved, the median would not be representative.

To avoid this problem, when an overlap function is calculated, each candidate is tested for the intervals of all other candidates (see the section “Final selection” in the Appendix: the test 8 and 3.i.i). With these tests, only overlap functions that are representative for the same temperature ranges are accepted.

As explained in the last paragraph of the appendix, to save computing time, these tests were omitted in specific cases. These tests are now always applied. Figures 3 to 9 were regenerated, with these cross-quality checks applied on all candidates. The text was modified accordingly (for example in section 4.2, 153 days was replaced by 141 days). These figures are very similar to the previous ones and the conclusions are not modified (see below).

To double check these assumptions, for the daily overlap function, the median was calculated only if the difference between maximum and minimum temperature of the overlap functions composing the median was less or equal 5°C. The result is shown on the lower panel. As expected, no visible difference was observed.

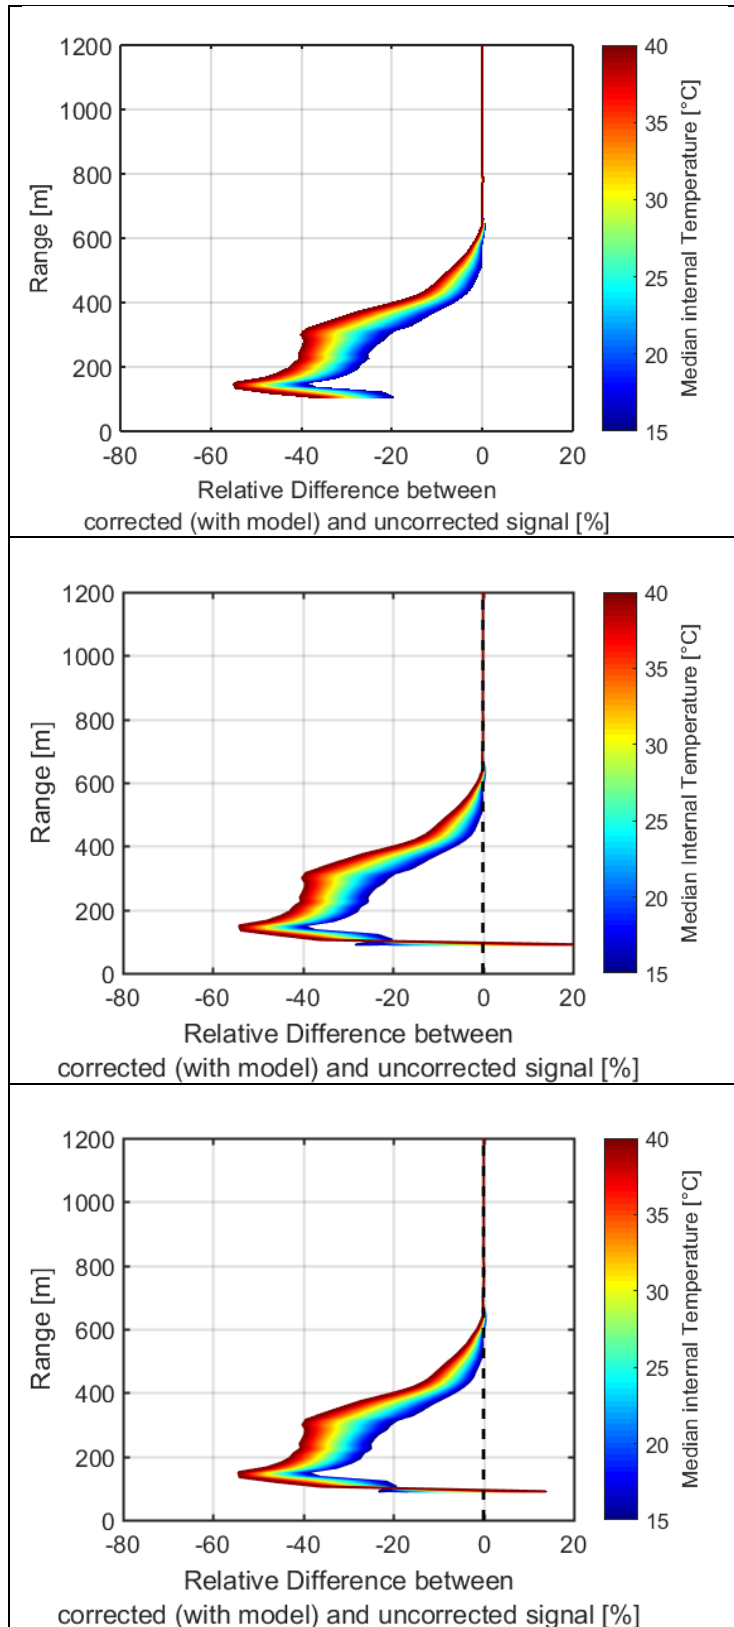

Figure 1: Reproduction of fig 7b. Upper panel: Original figure. Center panel: The cross-quality checks are now applied on all candidates. Lower Panel: with daily variability lower than 5°C

To reflect these changes, the last paragraph of the Appendix was removed.

- Page 9, lines 11-12: “Major advantages of the model are the possibilities to correct for short term variations on scales of hours (day/night) and to correct data in real time.” I would agree on that in case that daily variations would not have been discarded by the algorithm. See my comments to section 4.2 (above).

As explained above, the authors are convinced that the cross quality check is sufficient to ensure that this statement is valid.

- annex: page 17 line 4: “Under the assumption that the overlap function does not change” If I understood the algorithm correction, the authors don’t consider the whole overlap function, but just the part between  $R_{ok}$  and  $R_{max}$ . Could you clarify please?

As described page 17 line 7, these tests were applied from  $R_{ground}$  to range  $R_2$ , covering the entire overlap function.

- Figure 1: the dashed lines are barely visible in the printed version of the pdf. Please make them thicker.

Corrected.

- Figure 7: the caption is inconsistent. I guess correct would be Before correction (a and b), daily correction (c and d), model correction (e and f)

Corrected.

- Spelling: Caption figure 4: Payerne (starts with capital letter)

Corrected.

- page 19, lines 4-5: Re-check the reference for Stull. Is the publisher really Springer Science & Business Media.? Or it is Kluwer Academic publishers?

The last version of the book is available from Springer publisher ([https://books.google.ch/books?id=eRRz9RNvNOkC&redir\\_esc=y](https://books.google.ch/books?id=eRRz9RNvNOkC&redir_esc=y) <http://www.springer.com/us/book/9789027727688> ).
